# Supplementary material for: Endothelin-1 as a Mediator of Heme Oxygenase-1-Induced Stemness in Colorectal Cancer: Influence of p53
Source: MDPI journal article supplement (doi:10.3390/jpm11060509), 2021-06-04
Supplement: s1 [file s1]

**Table S1.** Characteristics of the patients included in the study

| Characteristic            | N (%)     |
|---------------------------|-----------|
| <b>Age</b>                |           |
| ≤72                       | 78 (52.0) |
| >72                       | 72 (48.0) |
| <b>Gender</b>             |           |
| Female                    | 92 (61.3) |
| Male                      | 58 (37.7) |
| <b>Location</b>           |           |
| Colon                     | 141 (94)  |
| Rectum                    | 9 (6)     |
| <b>Histological type</b>  |           |
| Well differentiated       | 38 (25.3) |
| Moderately differentiated | 94 (62.7) |
| Poorly differentiated     | 18 (12.0) |
| <b>pTMN Stage</b>         |           |
| Stage I                   | 15 (10.0) |
| Stage II                  | 59 (39.3) |
| Stage III                 | 64 (42.7) |
| Stage IV                  | 12 (8.0)  |

**Table S2.** Relationship between HO-1 and ECE-1 expression with the clinicopathological characteristics of the patients included in the study.

|                              | P53 wild-type    |                |                  |                |                  |                |
|------------------------------|------------------|----------------|------------------|----------------|------------------|----------------|
|                              | HO-1             | P <sup>a</sup> | ECE-1            | P <sup>a</sup> | EDN-1            | P              |
| <b>Age<sup>b</sup></b>       |                  |                |                  |                |                  |                |
| ≤ 72                         | 0.78 (0.46-2.68) | ns             | 1.18 (0.80-3.81) | ns             | 0.85 (0.52-1.21) | ns             |
| >72                          | 1.14 (0.64-2.00) |                | 1.11 (0.65-2.83) |                | 0.80 (0.26-1.47) |                |
| <b>Gender</b>                |                  |                |                  |                |                  |                |
| Male                         | 0.90 (0.54-2.47) | ns             | 1.16 (0.85-4.91) | ns             | 1.14 (0.65-3.55) | ns             |
| Female                       | 0.74 (0.52-1.70) |                | 1.15 (0.62-2.27) |                | 1.32 (0.47-2.72) |                |
| <b>TNM stage</b>             |                  |                |                  |                |                  |                |
| I+II                         | 0.90 (0.52-2.06) | ns             | 1.17 (0.77-2.53) | ns             | 0.86 (0.40-1.21) | ns             |
| III+IV                       | 0.74 (0.53-2.90) |                | 1.11 (0.63-8.06) |                | 0.84 (0.42-1.38) |                |
| <b>Differentiation grade</b> |                  |                |                  |                |                  |                |
| Well                         | 0.58 (0.45-1.23) | ns             | 1.04 (0.77-2.19) | ns             | 0.66 (0.42-1.21) | ns             |
| Moderately                   | 1.14 (0.58-2.94) |                | 1.34 (0.70-4.51) |                | 0.90 (0.38-1.51) |                |
| Poor                         | 1.14 (0.71-3.52) |                | 1.40 (1.06-3.79) |                | 0.74 (0.31-1.08) |                |
|                              | P53 mutated      |                |                  |                |                  |                |
|                              | HO-1             | P <sup>a</sup> | ECE-1            | P <sup>a</sup> | EDN-1            | P <sup>a</sup> |
| <b>Age<sup>b</sup></b>       |                  |                |                  |                |                  |                |
| ≤ 72                         | 1.18 (0.80-3.81) | ns             | 1.11 (0.46-5.26) | ns             | 0.85 (0.39-2.15) | ns             |
| >72                          | 1.11 (0.65-2.83) |                | 1.25 (0.63-2.10) |                | 0.92 (0.48-1.77) |                |
| <b>Gender</b>                |                  |                |                  |                |                  |                |
| Male                         | 1.16 (0.85-4.91) | ns             | 1.14 (0.65-3.55) | ns             | 0.90 (0.55-2.15) | ns             |
| Female                       | 1.15 (0.62-2.27) |                | 1.32 (0.47-2.72) |                | 0.86 (0.30-1.67) |                |
| <b>pTNM stage</b>            |                  |                |                  |                |                  |                |
| I+II                         | 1.17 (0.77-2.53) | ns             | 1.40 (0.64-2.83) | ns             | 0.86 (0.40-2.10) | ns             |
| III+IV                       | 1.11 (0.63-8.06) |                | 1.02 (0.53-3.13) |                | 0.89 (0.50-1.70) |                |
| <b>Differentiation grade</b> |                  |                |                  |                |                  |                |
| Well                         | 1.04 (0.77-2.19) | ns             | 1.36 (0.64-2.31) | ns             | 0.72 (0.31-2.37) | ns             |
| Moderately                   | 1.34 (0.70-4.51) |                | 1.25 (0.52-4.66) |                | 0.95 (0.64-1.74) |                |
| Poor                         | 1.40 (1.06-3.79) |                | 1.39 (0.70-0.85) |                | 0.72 (0.32-1.33) |                |

<sup>a</sup>P values were obtained using the Mann-Whitney or Kruskal-Wallis non-parametric tests; <sup>b</sup>Dicotomized by the median.

**Table S3.** Correlations between HO-1 and genes related to ET-1 synthesis according to p53 status and levels of CSC markers

| <b>P53 wild-type</b> |                                              |                                                |
|----------------------|----------------------------------------------|------------------------------------------------|
|                      | <b>CD133<sub>low</sub>CD44<sub>low</sub></b> | <b>CD133<sub>high</sub>CD44<sub>high</sub></b> |
| <b>ECE-1</b>         |                                              |                                                |
| <sup>a</sup> Rs      | <b>0.700</b>                                 | <b>0.604</b>                                   |
| P                    | <b>0.001</b>                                 | <b>0.001</b>                                   |
| <b>EDN-1</b>         |                                              |                                                |
| <sup>a</sup> Rs      | -0.346                                       | -0.088                                         |
| P                    | ns                                           | ns                                             |
| <b>P53 mutated</b>   |                                              |                                                |
|                      | <b>CD133<sub>low</sub>CD44<sub>low</sub></b> | <b>CD133<sub>high</sub>CD44<sub>high</sub></b> |
| <b>ECE-1</b>         |                                              |                                                |
| <sup>a</sup> Rs      | <b>0.648</b>                                 | <b>0.661</b>                                   |
| P                    | <b>0.001</b>                                 | <b>0.037</b>                                   |
| <b>EDN-1</b>         |                                              |                                                |
| <sup>a</sup> Rs      | 0.142                                        | 0.322                                          |
| P                    | ns                                           | ns                                             |

<sup>a</sup>Pearson's correlation coefficient
